# Supplementary material
Source: Springer Nature journal article supplement (https://www.springermedizin.de/resource/supplementary/12990_2009_238_MOESM6_ESM.pdf/9612864)

A

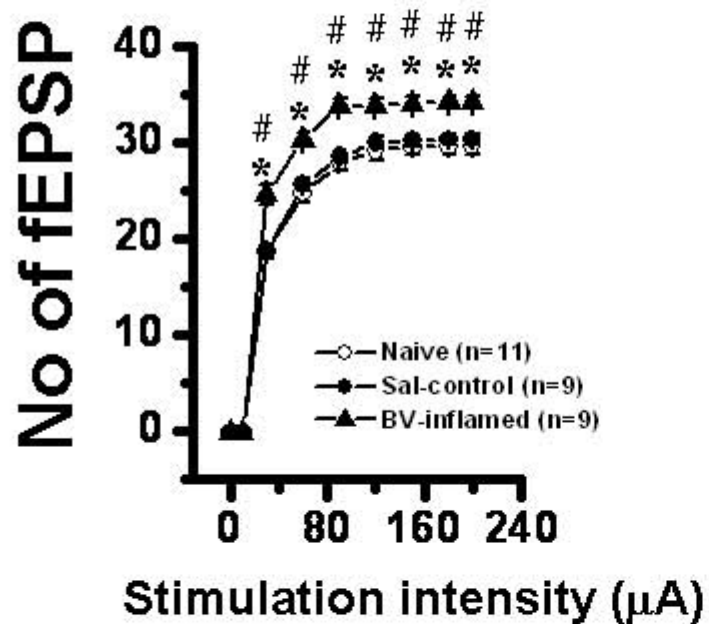

B

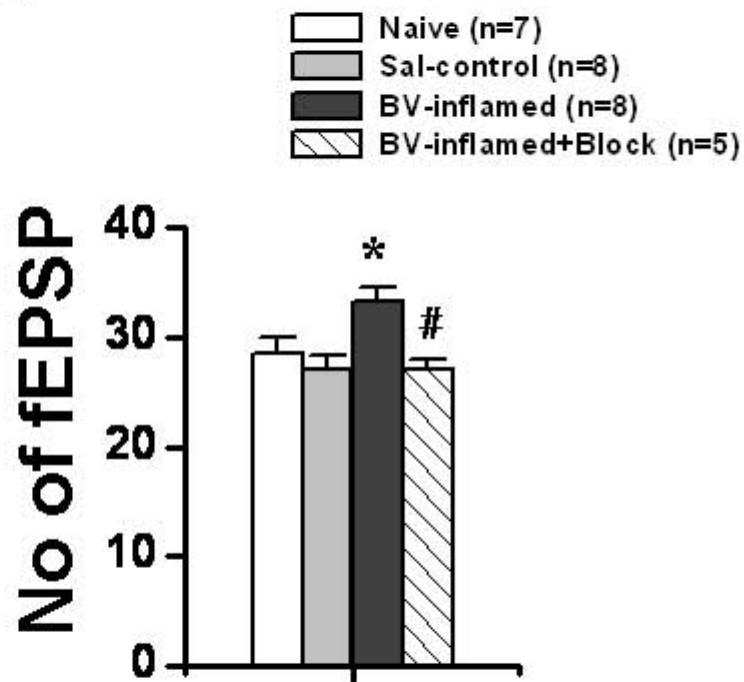

Supplement: MOESM6 [file 9612864]
